# Supplementary material
Source: publisher site journal article supplement (https://static.cambridge.org/content/id/urn:cambridge.org:id:article:S0962728600010150/resource/name/Grumett_Appendix.pdf)
Supplement: Supplementary file 1 [file Grumett_Appendix.pdf]

## Electrical shock energizer device consolidated data

Many manufacturers of shock energisers **DO** publish

- a) **voltage** (Max)(no load voltage)
- b) **Joules** (actual energy deliverable, not initial stored energy)
- c) **Fence** length over which the energiser would (in ideal conditions) be effective
- d) **Suggested species** for the energisers to be used with

The manufacturers **DO NOT** tend to publish

- d) **Pulse duration**
- e) **Watts output**
- f) **Amps output**

### *i) Fixed and moveable electric fencing*

#### Cattle fencing

| Anonymous code | Joules | Volt  | Fence length equivalent (km)(no vegetation contact, good wire conductor) |
|----------------|--------|-------|--------------------------------------------------------------------------|
| C1             | 4.7    | 11300 | 25                                                                       |
| C2             | 7      | 10000 | 45                                                                       |
| C3             | 11     | 11200 | 70                                                                       |
| C4             | 18.5   | 11500 | 90                                                                       |
| C5             | 3.2    | 9600  | 24                                                                       |
| C6             | 7.6    | 10000 | 40                                                                       |
| C7             | 5      | 9700  | 28                                                                       |
| C8             | 7.6    | 10000 | 43                                                                       |
| C9             | 2      | 9000  | 15                                                                       |
| C10            | 0.4    | 10200 | 4                                                                        |
| C11            | 0.37   | 10200 | 4                                                                        |
| C12            | 2.6    | 10000 | 19                                                                       |
| C13            | 4      | 11500 | 29                                                                       |
| C14            | 6      | 11500 | 38                                                                       |
| C15            | 1.5    | 10000 | 8                                                                        |
| C16            | 4.5    | 10300 | 28                                                                       |
| C17            | 7      | 10800 | 35                                                                       |
| C18            | 0.4    | 10500 | 4.4                                                                      |
| C19            | 3.5    | 9750  | 26                                                                       |
| C20            | 5      | 11200 | 23                                                                       |
| C21            | 7.5    | 11000 | 40                                                                       |

|     |      |       |     |
|-----|------|-------|-----|
| C22 | 10   | 10500 | 70  |
| C23 | 11   | 11000 | 80  |
| C24 | 13   | 10000 | 90  |
| C25 | 15   | 10500 | 100 |
| C26 | 20   | 10500 | 120 |
| C27 | 0.08 | 9200  | 1.5 |
| C28 | 0.07 | 7000  | 1   |
| C29 | 0.13 | 6900  | 1.5 |
| C30 | 0.16 | 6900  | 3   |
| C31 | 0.29 | 7800  | 5   |
| C32 | 0.74 | 9000  | 10  |
| C33 | 1.6  | 9600  | 20  |
| C34 | 3    | 9800  | 30  |
| C35 | 0.12 | 9600  | 2   |
| C36 | 0.19 | 9600  | 4   |
| C37 | 0.27 | 9600  | 6   |
| C38 | 0.30 | 9600  | 10  |
| C39 | 0.40 | 8000  | 6   |
| C40 | 0.55 | 10000 | 10  |
| C41 | 1.1  | 9000  | 20  |
| C42 | 2    | 10000 | 30  |
| C43 | 0.6  | 7700  | 9   |
| C44 | 2.7  | 8700  | 28  |
| C45 | 3.9  | 9200  | 35  |
| C46 | 4.5  | 9200  | 40  |
| C47 | 6.1  | 7700  | 42  |
| C48 | 7.7  | 7700  | 55  |
| C49 | 1.5  | 9000  | 20  |
| C50 | 3    | 9100  | 30  |
| C51 | 4.7  | 9200  | 40  |
| C52 | 1.2  | 8500  | 16  |
| C53 | 2    | 9100  | 25  |
| C54 | 10   | 7000  | 65  |
| C55 | 14   | 7000  | 80  |
| C56 | 15   | 9000  | 100 |
| C57 | 0.33 | 9500  | 0.8 |
| C58 | 0.84 | 7800  | 1   |
| C59 | 0.35 | 10000 | 2.2 |
| C60 | 0.18 | 9500  | 1.5 |
| C61 | 0.57 | 12000 | 6   |
| C62 | 1.4  | 11500 | 18  |
| C63 | 2.24 | 11500 | 25  |
| C64 | 0.33 | 10000 | 5   |
| C65 | 0.14 | 9200  | 1.5 |
| C66 | 4.9  | 9300  | 50  |
| C67 | 16   | 9200  | 65  |
| C68 | 25   | 9500  | 85  |
| C69 | 3.6  | 9800  | 30  |
| C70 | 4.2  | 9500  | 25  |
| C71 | 2.4  | 9700  | 20  |
| C72 | 1.4  | 9000  | 20  |
| C73 | 0.45 | 7500  | 8   |
| C74 | 0.2  | 8500  | 1   |

|      |      |       |     |
|------|------|-------|-----|
| C75  | 0.6  | 10000 | 10  |
| C76  | 1.2  | 10000 | 20  |
| C77  | 0.2  | 8500  | 2.5 |
| C78  | 0.6  | 10000 | 10  |
| C79  | 1.2  | 10000 | 20  |
| C80  | 4.8  | 16800 | 130 |
| C81  | 8    | 12000 | 180 |
| C82  | 3    | 11800 | 80  |
| C83  | 3    | 14700 | 100 |
| C84  | 14.3 | 12000 | 85  |
| C85  | 3    | 11000 | 80  |
| C86  | 1    | 11000 | 40  |
| C87  | 2    | 11200 | 50  |
| C88  | 1.2  | 8600  | 12  |
| C89  | 0.8  | 8400  | 8   |
| C90  | 4.9  | 14500 | 130 |
| C91  | 2    | 14000 | 50  |
| C92  | 2    | 14000 | 15  |
| C93  | 0.3  | 10000 | 9.5 |
| C94  | 0.37 | 13000 | 10  |
| C95  | 1    | 9000  | 40  |
| C96  | 4.8  | 14000 | 130 |
| C97  | 0.45 | 7900  | 8   |
| C98  | 5    | 9500  | 120 |
| C99  | 2.7  | 9000  | 60  |
| C100 | 4.2  | 9300  | 120 |
| C101 | 0.45 | 8000  | 15  |
| C102 | 5.2  | 9000  |     |
| C103 | 1.2  | 9000  |     |
| C104 | 0.09 | 5000  |     |
| C105 | 2.5  | 9300  | 70  |
| C106 | 4.5  | 10000 | 120 |
| C107 | 6.5  | 10000 | 180 |
| C108 | 10   | 10200 | 300 |
| C109 | 14.5 | 10200 | 350 |
| C110 | 7.5  | 9850  | 235 |
| C111 | 10   | 10000 | 300 |
| C112 | 15   | 10000 | 350 |
| C113 | 0.34 | 9100  | 23  |
| C114 | 0.71 | 8500  | 86  |
| C115 | 1.36 | 8500  | 86  |
| C116 | 0.43 | 9100  | 23  |
| C117 | 0.86 | 8500  | 35  |
| C118 | 1.86 | 5500  | 60  |
| C119 | 1.4  | 9000  | 60  |
| C120 | 3.7  | 9000  | 160 |
| C121 | 6    | 9200  | 220 |
| C122 | 9.3  | 9500  | 310 |
| C123 | 14   | 11700 | 475 |

**Summary cattle fence energiser data**

|                 | <b>Joules (J)</b> | <b>Voltage (V)<br/>(max)</b> | <b>Watt (W)<br/>(assuming pulse<br/>duration 0.0003<br/>s)</b> | <b>Km (high<br/>conductivity<br/>fence, ideal)</b> |
|-----------------|-------------------|------------------------------|----------------------------------------------------------------|----------------------------------------------------|
| <b>Averages</b> | 4.23              | 9779                         | 14114                                                          | 25                                                 |
| <b>Maximum</b>  | 25.00             | 16800                        | 83333                                                          | 475.0                                              |
| <b>Minimum</b>  | 0.07              | 5000                         | 233                                                            | 0.8                                                |

### Sheep fencing

| <b>Anonymous<br/>code</b> | <b>Joules</b> | <b>Volt</b> | <b>Fence length<br/>equivalent<br/>(km)(no<br/>vegetation contact,<br/>good wire<br/>conductor)</b> |
|---------------------------|---------------|-------------|-----------------------------------------------------------------------------------------------------|
| S1                        | 4.7           | 11300       | 25                                                                                                  |
| S2                        | 7             | 10000       | 45                                                                                                  |
| S3                        | 11            | 11200       | 70                                                                                                  |
| S4                        | 18.5          | 11500       | 90                                                                                                  |
| S5                        | 3.2           | 9600        | 24                                                                                                  |
| S6                        | 7.6           | 10000       | 40                                                                                                  |
| S7                        | 5             | 9700        | 28                                                                                                  |
| S8                        | 7.6           | 10000       | 43                                                                                                  |
| S9                        | 2             | 9000        | 15                                                                                                  |
| S10                       | 4             | 11500       | 29                                                                                                  |
| S11                       | 6             | 11500       | 38                                                                                                  |
| S12                       | 1.5           | 10000       | 8                                                                                                   |
| S13                       | 4.5           | 10300       | 28                                                                                                  |
| S14                       | 7             | 10800       | 35                                                                                                  |
| S15                       | 0.4           | 10500       | 4.4                                                                                                 |
| S16                       | 3.5           | 9750        | 26                                                                                                  |
| S17                       | 5             | 11200       | 23                                                                                                  |
| S18                       | 7.5           | 11000       | 40                                                                                                  |
| S19                       | 10            | 10500       | 70                                                                                                  |
| S20                       | 11            | 11000       | 80                                                                                                  |
| S21                       | 13            | 10000       | 90                                                                                                  |
| S22                       | 15            | 10500       | 100                                                                                                 |
| S23                       | 20            | 10500       | 120                                                                                                 |
| S24                       | 0.07          | 7000        | 1                                                                                                   |
| S25                       | 0.13          | 6900        | 1.5                                                                                                 |
| S26                       | 0.16          | 6900        | 3                                                                                                   |
| S27                       | 0.29          | 7800        | 5                                                                                                   |
| S28                       | 0.74          | 9000        | 10                                                                                                  |
| S29                       | 1.6           | 9600        | 20                                                                                                  |

|     |      |       |     |
|-----|------|-------|-----|
| S30 | 3    | 9800  | 30  |
| S31 | 0.12 | 9600  | 2   |
| S32 | 0.19 | 9600  | 4   |
| S33 | 0.27 | 9600  | 6   |
| S34 | 0.30 | 9600  | 10  |
| S35 | 0.40 | 8000  | 6   |
| S36 | 0.55 | 10000 | 10  |
| S37 | 1.1  | 9000  | 20  |
| S38 | 2    | 10000 | 30  |
| S39 | 0.6  | 7700  | 9   |
| S40 | 2.7  | 8700  | 28  |
| S41 | 3.9  | 9200  | 35  |
| S42 | 4.5  | 9200  | 40  |
| S43 | 6.1  | 7700  | 42  |
| S44 | 7.7  | 7700  | 55  |
| S45 | 1.5  | 9000  | 20  |
| S46 | 3    | 9100  | 30  |
| S47 | 4.7  | 9200  | 40  |
| S48 | 1.2  | 8500  | 16  |
| S49 | 2    | 9100  | 25  |
| S50 | 10   | 7000  | 65  |
| S51 | 14   | 7000  | 80  |
| S52 | 15   | 9000  | 100 |
| S53 | 1.2  | 10000 | 20  |
| S54 | 1.2  | 10000 | 20  |
| S55 | 4.8  | 16800 | 130 |
| S56 | 8    | 12000 | 180 |
| S57 | 3    | 11800 | 80  |
| S58 | 3    | 14700 | 100 |
| S59 | 14.3 | 12000 | 85  |
| S60 | 3    | 11000 | 80  |
| S61 | 1    | 11000 | 40  |
| S62 | 2    | 11200 | 50  |
| S63 | 1.2  | 8600  | 12  |
| S64 | 0.8  | 8400  | 8   |
| S65 | 4.9  | 14500 | 130 |
| S66 | 2    | 14000 | 50  |
| S67 | 2    | 14000 | 15  |
| S68 | 0.37 | 13000 | 10  |
| S69 | 1    | 9000  | 40  |
| S70 | 4.8  | 14000 | 130 |
| S71 | 0.45 | 7900  | 8   |
| S72 | 5    | 9500  | 120 |
| S73 | 2.7  | 9000  | 60  |
| S74 | 4.2  | 9300  | 120 |
| S75 | 2.5  | 9300  | 70  |
| S76 | 4.5  | 10000 | 120 |
| S77 | 6.5  | 10000 | 180 |
| S78 | 10   | 10200 | 300 |
| S79 | 7.5  | 9850  | 235 |
| S80 | 10   | 10000 | 300 |
| S81 | 15   | 10000 | 350 |
| S82 | 1.4  | 9000  | 60  |

|     |     |      |     |
|-----|-----|------|-----|
| S83 | 3.7 | 9000 | 160 |
| S84 | 6   | 9200 | 220 |
| S85 | 9.3 | 9500 | 310 |

### Summary sheep fence energizer data

|                 | <b>Joules (J)</b> | <b>Voltage (V)<br/>(max)</b> | <b>Watt (W)<br/>(assuming<br/>pulse<br/>duration<br/>0.0003 s)</b> | <b>Km (high<br/>conductivity<br/>fence, ideal)</b> |
|-----------------|-------------------|------------------------------|--------------------------------------------------------------------|----------------------------------------------------|
| <b>Averages</b> | 4.83              | 9995.29                      | 16083.92                                                           | 65.98                                              |
|                 |                   |                              |                                                                    |                                                    |
| <b>Maximum</b>  | 20.00             | 16800.00                     | 66666.67                                                           | 350.00                                             |
| <b>Minimum</b>  | 0.07              | 6900.00                      | 233.33                                                             | 1.00                                               |

### Goat fencing

| <b>Anonymous<br/>code</b> | <b>Joules</b> | <b>Volt</b> | <b>Fence length<br/>equivalent<br/>(km)(no<br/>vegetation contact,<br/>good wire<br/>conductor)</b> |
|---------------------------|---------------|-------------|-----------------------------------------------------------------------------------------------------|
| G1                        | 4.7           | 11300       | 25                                                                                                  |
| G2                        | 7             | 10000       | 45                                                                                                  |
| G3                        | 11            | 11200       | 70                                                                                                  |
| G4                        | 18.5          | 11500       | 90                                                                                                  |
| G5                        | 3.2           | 9600        | 24                                                                                                  |
| G6                        | 7.6           | 10000       | 40                                                                                                  |
| G7                        | 5             | 9700        | 28                                                                                                  |
| G8                        | 7.6           | 10000       | 43                                                                                                  |
| G9                        | 2             | 9000        | 15                                                                                                  |
| G10                       | 0.4           | 10200       | 4                                                                                                   |
| G11                       | 4             | 11500       | 29                                                                                                  |
| G12                       | 6             | 11500       | 38                                                                                                  |
| G13                       | 7             | 10800       | 35                                                                                                  |
| G14                       | 0.4           | 10500       | 4.4                                                                                                 |
| G15                       | 3.5           | 9750        | 26                                                                                                  |
| G16                       | 5             | 11200       | 23                                                                                                  |
| G17                       | 7.5           | 11000       | 40                                                                                                  |
| G18                       | 10            | 10500       | 70                                                                                                  |
| G19                       | 11            | 11000       | 80                                                                                                  |
| G20                       | 13            | 10000       | 90                                                                                                  |
| G21                       | 15            | 10500       | 100                                                                                                 |
| G22                       | 20            | 10500       | 120                                                                                                 |
| G23                       | 0.08          | 9200        | 1.5                                                                                                 |
| G24                       | 0.07          | 7000        | 1                                                                                                   |
| G25                       | 0.13          | 6900        | 1.5                                                                                                 |

|     |      |       |     |
|-----|------|-------|-----|
| G26 | 0.16 | 6900  | 3   |
| G27 | 0.29 | 7800  | 5   |
| G28 | 0.74 | 9000  | 10  |
| G29 | 1.6  | 9600  | 20  |
| G30 | 3    | 9800  | 30  |
| G31 | 0.12 | 9600  | 2   |
| G32 | 0.19 | 9600  | 4   |
| G33 | 0.27 | 9600  | 6   |
| G34 | 0.30 | 9600  | 10  |
| G35 | 0.40 | 8000  | 6   |
| G36 | 0.55 | 10000 | 10  |
| G37 | 1.1  | 9000  | 20  |
| G38 | 2    | 10000 | 30  |
| G39 | 0.6  | 7700  | 9   |
| G40 | 2.7  | 8700  | 28  |
| G41 | 3.9  | 9200  | 35  |
| G42 | 4.5  | 9200  | 40  |
| G43 | 6.1  | 7700  | 42  |
| G44 | 7.7  | 7700  | 55  |
| G45 | 1.5  | 9000  | 20  |
| G46 | 3    | 9100  | 30  |
| G47 | 4.7  | 9200  | 40  |
| G48 | 1.2  | 8500  | 16  |
| G49 | 2    | 9100  | 25  |
| G50 | 10   | 7000  | 65  |
| G51 | 14   | 7000  | 80  |
| G52 | 0.33 | 9500  | 0.8 |
| G53 | 0.84 | 7800  | 1   |
| G54 | 0.35 | 10000 | 2.2 |
| G55 | 0.18 | 9500  | 1.5 |
| G56 | 0.57 | 12000 | 6   |
| G57 | 1.4  | 11500 | 18  |
| G58 | 2.24 | 11500 | 25  |
| G59 | 0.33 | 10000 | 5   |
| G60 | 1.2  | 10000 | 20  |
| G61 | 1.2  | 10000 | 20  |
| G62 | 4.8  | 16800 | 130 |
| G63 | 8    | 12000 | 180 |
| G64 | 3    | 11800 | 80  |
| G65 | 3    | 14700 | 100 |
| G66 | 14.3 | 12000 | 85  |
| G67 | 3    | 11000 | 80  |
| G68 | 1    | 11000 | 40  |
| G69 | 2    | 11200 | 50  |
| G70 | 1.2  | 8600  | 12  |
| G71 | 0.8  | 8400  | 8   |
| G72 | 4.9  | 14500 | 130 |
| G73 | 2    | 14000 | 50  |
| G74 | 2    | 14000 | 15  |
| G75 | 0.37 | 13000 | 10  |
| G76 | 1    | 9000  | 40  |
| G77 | 4.8  | 14000 | 130 |
| G78 | 0.45 | 7900  | 8   |

|     |     |      |     |
|-----|-----|------|-----|
| G79 | 5   | 9500 | 120 |
| G80 | 2.7 | 9000 | 60  |
| G81 | 4.2 | 9300 | 120 |
| G82 | 2.5 | 9300 | 70  |

### Summary goat fence energizer data

|                 | Joules (J) | Voltage (V) (max) | Watt (W)<br>(assuming pulse duration 0.0003 s) | Km (high conductivity fence, ideal) |
|-----------------|------------|-------------------|------------------------------------------------|-------------------------------------|
| <b>Averages</b> | 3.93       | 10058             | 13088                                          | 40                                  |
| <b>Maximum</b>  | 20.00      | 16800             | 66667                                          | 180                                 |
| <b>Minimum</b>  | 0.07       | 6900              | 233                                            | 0.80                                |

### Pig fencing

| Anonymous code | Joules | Volt  | Fence length equivalent (km)(no vegetation contact, good wire conductor) |
|----------------|--------|-------|--------------------------------------------------------------------------|
| P1             | 4.7    | 11300 | 25                                                                       |
| P2             | 18.5   | 11500 | 90                                                                       |
| P3             | 5      | 9700  | 28                                                                       |
| P4             | 7.6    | 10000 | 43                                                                       |
| P5             | 2      | 9000  | 15                                                                       |
| P6             | 0.37   | 10200 | 4                                                                        |
| P7             | 1.3    | 9500  | 10                                                                       |
| P8             | 2.6    | 10000 | 19                                                                       |
| P9             | 4      | 11500 | 29                                                                       |
| P10            | 1.5    | 10000 | 8                                                                        |
| P11            | 0.4    | 10500 | 4.4                                                                      |
| P12            | 3.5    | 9750  | 26                                                                       |
| P13            | 3      | 12000 | 15                                                                       |
| P14            | 7.5    | 11000 | 40                                                                       |
| P15            | 10     | 10500 | 70                                                                       |
| P16            | 0.24   | 10000 | 3.5                                                                      |
| P17            | 0.43   | 10800 | 5                                                                        |
| P18            | 0.12   | 9600  | 2                                                                        |
| P19            | 0.19   | 9600  | 4                                                                        |
| P20            | 0.27   | 9600  | 6                                                                        |



|     |      |       |     |
|-----|------|-------|-----|
| P21 | 0.30 | 9600  | 10  |
| P22 | 0.40 | 8000  | 6   |
| P23 | 0.55 | 10000 | 10  |
| P24 | 1.1  | 9000  | 20  |
| P25 | 2    | 10000 | 30  |
| P26 | 2.7  | 8700  | 28  |
| P27 | 4.5  | 9200  | 40  |
| P28 | 14   | 7000  | 80  |
| P29 | 1.2  | 10000 | 20  |
| P30 | 4.8  | 16800 | 130 |
| P31 | 8    | 12000 | 180 |
| P32 | 3    | 11800 | 80  |
| P33 | 3    | 14700 | 100 |
| P34 | 14.3 | 12000 | 85  |
| P35 | 1    | 11000 | 40  |
| P36 | 2    | 11200 | 50  |
| P37 | 1.2  | 8600  | 12  |
| P38 | 0.8  | 8400  | 8   |
| P39 | 4.9  | 14500 | 130 |
| P40 | 2    | 14000 | 15  |
| P41 | 1    | 9000  | 40  |
| P42 | 0.45 | 7900  | 8   |
| P43 | 2.7  | 9000  | 60  |
| P44 | 4.2  | 9300  | 120 |
| P45 | 0.45 | 8000  | 15  |

### Summary pig fence energizer data

|                 | Joules (J) | Voltage (V)<br>(max) | Watt (W)<br>(assuming<br>pulse<br>duration<br>0.0003 s) | Km (high<br>conductivity<br>fence, ideal) |
|-----------------|------------|----------------------|---------------------------------------------------------|-------------------------------------------|
| <b>Averages</b> | 3.42       | 10350                | 11390                                                   | 39                                        |
| <b>Maximum</b>  | 18.50      | 16800                | 61667                                                   | 180                                       |
| <b>Minimum</b>  | 0.12       | 7000                 | 400                                                     | 2                                         |

### Poultry fencing

| Anonymous ID | Joules (J) | Voltage (V) (max) | Watt (W) (assuming pulse duration 0.0003 s) | Km (high conductivity fence, ideal) |
|--------------|------------|-------------------|---------------------------------------------|-------------------------------------|
| Av1          | 0.8        | 9500              | 2667                                        | 7                                   |
| Av2          | 2          | 9000              | 6667                                        | 15                                  |
| Av3          | 3.2        | 9600              | 10667                                       | 24                                  |
| Av4          | 5          | 9700              | 16667                                       | 28                                  |
| Av5          | 0.4        | 10200             | 1333                                        | 4                                   |
| Av6          | 0.37       | 10200             | 1233                                        | 4                                   |
| Av7          | 1.3        | 9500              | 4333                                        | 10                                  |
| Av8          | 2.6        | 10000             | 8667                                        | 19                                  |
| Av9          | 1.5        | 10000             | 5000                                        | 8                                   |
| Av10         | 0.4        | 10500             | 1333                                        | 4.4                                 |
| Av11         | 3.5        | 9750              | 11667                                       | 26                                  |
| Av12         | 3          | 12000             | 10000                                       | 15                                  |
| Av14         | 0.24       | 10000             | 800                                         | 3.5                                 |
| Av15         | 0.43       | 10800             | 1433                                        | 5                                   |
| Av16         | 0.4        | 8000              | 1333                                        | 6                                   |
| Av17         | 0.2        | 8500              | 667                                         | 1                                   |
| Av19         | 3          | 11000             | 10000                                       | 80                                  |
| Av20         | 1.2        | 8600              | 4000                                        | 12                                  |
| Av21         | 0.8        | 8400              | 2667                                        | 8                                   |
| Av24         | 0.37       | 13000             | 1233                                        | 10                                  |

|      |      |      |       |     |
|------|------|------|-------|-----|
| Av26 | 0.45 | 7900 | 1500  | 8   |
| Av27 | 5    | 9500 | 16667 | 120 |
| Av28 | 2.7  | 9000 | 9000  | 60  |
| Av29 | 4.2  | 9300 | 14000 | 120 |
| Av30 | 0.45 | 8000 | 1500  | 15  |
| Av31 | 2.5  | 9300 | 8333  | 70  |

### Summary poultry fence energizer data

|          |  | Joules (J) | Voltage (V)<br>(max) | Watt (W)<br>(assuming<br>pulse duration<br>0.0003 s) | Km (high<br>conductivity<br>fence, ideal) |
|----------|--|------------|----------------------|------------------------------------------------------|-------------------------------------------|
| Averages |  | 1.77       | 9663                 | 5899                                                 | 26.27                                     |
| Maximum  |  | 5.00       | 13000                | 16667                                                | 120.00                                    |
| Minimum  |  | 0.20       | 7900                 | 667                                                  | 1.00                                      |

### *ii) Cattle trainers*

#### Energizer data - Cow trainers

| Anonymous code | Voltage / Joule                 |
|----------------|---------------------------------|
| CT1            | 2500 or 1500 V                  |
| CT2            | 8000 V<br>0.02 J                |
| CT3            | 5000 V<br>0.09 J                |
| AVERAGES       | <b>4250 V</b><br><b>0.055 J</b> |

### *iii) Prods or goads*

#### Energizer data - Goats/prods

| Anonymous code | Voltage |
|----------------|---------|
| UK             |         |

|     |                                          |
|-----|------------------------------------------|
| P1  | 5000 V                                   |
| P2  | 5000 V                                   |
| P3  | 5000 V                                   |
| P4  | 5000 V                                   |
| P5  | 5000 V                                   |
| P6  | 5000 V                                   |
| P7  | Wrong voltage provide on product website |
| P8  | 5600 V                                   |
| P9  | 3800 V                                   |
| P10 | 5000 V                                   |
| P11 | 4000 V                                   |
| EU  |                                          |
| P13 | 5000 V                                   |
| P14 | 5000 V                                   |
| P15 | 5000 V                                   |
|     | <b>Average<br/>4877 V</b>                |

v) *Dairy collecting yard backing gates*

**Energizer data - Backing / crowd gates**

| <b>Anonymous code</b> | <b>Joule</b> | <b>Volt</b> | <b>Fence length equivalent</b> |
|-----------------------|--------------|-------------|--------------------------------|
| BG1                   | 0.3          | 7500        | 3                              |

vii) *Collars linked to virtual fencing and containment systems*

**Energizer data - Virtual fences**

| <b>Anonymous code</b> | <b>Joules</b> | <b>Volt</b> | <b>Comment</b>                                      |
|-----------------------|---------------|-------------|-----------------------------------------------------|
| VF1                   | 0.2           | 3000        | Duration 1.0 Sec pulse<br>82dB @ 1m sound deterrent |
| VF2                   | ?             | ?           |                                                     |
| VF3                   | ?             | ?           |                                                     |
